# Supplementary material for: Revealing long–range orbit–orbit interaction between coherent light-emitting excitons occurring in amplified spontaneous emission in CsPbBr3 microstructures
Source: Royal Society of Chemistry journal article supplement (doi:10.1039/d1tc00728a), 2021-01-01
Supplement: d1tc00728a1.pdf [file d1tc00728a1.pdf]

**Supporting Information**

**Revealing Long-Range Orbit-Orbit Interaction between Coherent Light-Emitting Excitons  
Occurring in Amplified Spontaneous Emission in CsPbBr<sub>3</sub> Microstructures**

Miaosheng Wang, Jia Zhang, Xixiang Zhu, Hengxing Xu, and Bin Hu\*

*Joint Institute for Advanced Materials, Department of Materials Science and Engineering,  
University of Tennessee, Knoxville, Tennessee, 37996, USA*

\*Corresponding authors:

Bin Hu, E-mail: [bhu@utk.edu](mailto:bhu@utk.edu)

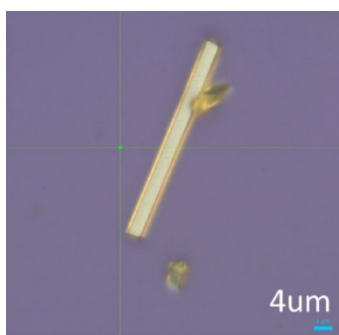

Figure S1. Magnified optical microscopy image of a single  $\text{CsPbBr}_3$  microrod grown in the glass substrate.

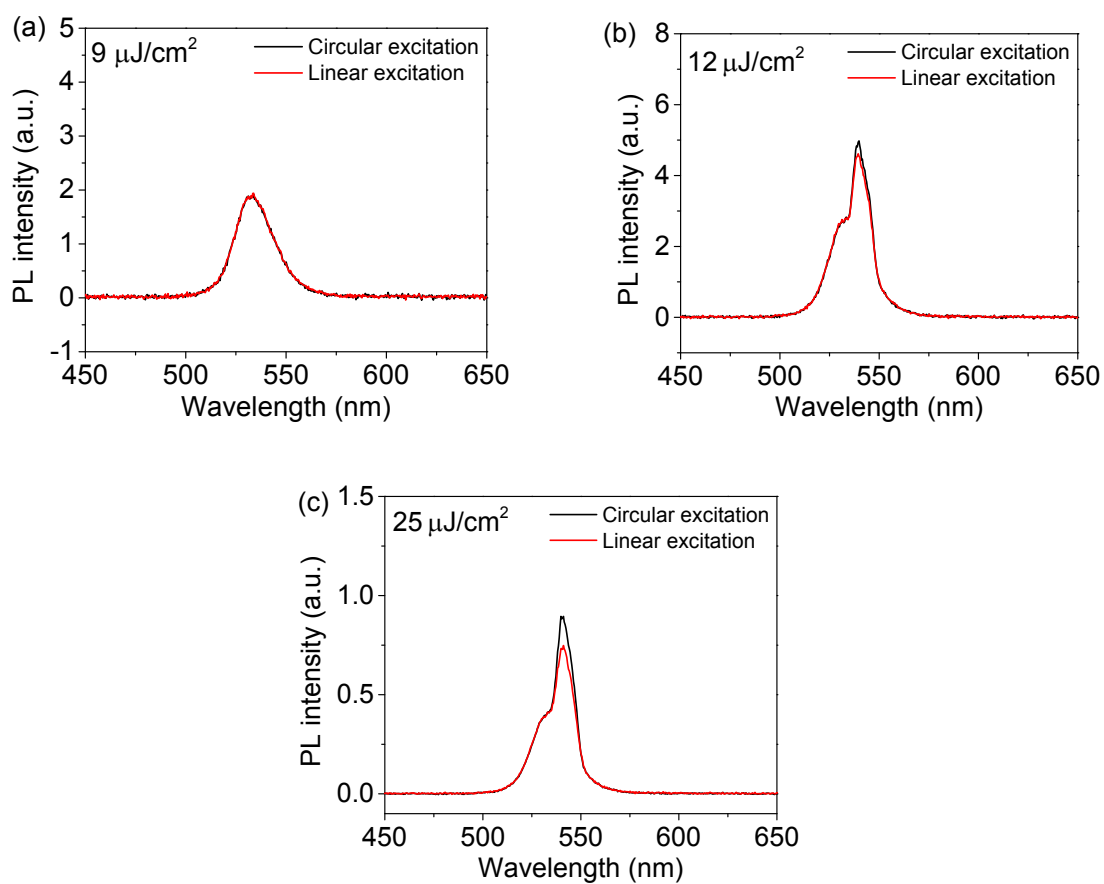

Figure S2. ASE spectra under circular and linear polarization sources at different excitation intensity below and above the threshold.
